# Supplementary material for: Demonstrating Biological Fate of Nanoparticle-Loaded Dissolving Microneedles with Aggregation-Caused Quenching Probes: Influence of Application Sites
Source: MDPI journal article supplement (doi:10.3390/pharmaceutics15010169), 2023-01-03
Supplement: s1 [file s1]

## Supplementary materials

# Demonstrating Biological Fate of Nanoparticle-Loaded Dissolving Microneedles with Aggregation-Caused Quenching Probes: Influence of Application Sites

Yanping Fu <sup>1</sup>, Chaonan Shi <sup>1</sup>, Xiaodie Li <sup>1</sup>, Ting Wen <sup>2</sup>, Qiaoli Wu <sup>3</sup>, Antian Zhang <sup>1</sup>, Ping Hu <sup>1</sup>, Chuanbin Wu <sup>1</sup>, Xin Pan <sup>2</sup>, Zhengwei Huang <sup>1,\*</sup>, and Guilan Quan <sup>1,\*</sup>

<sup>1</sup> College of Pharmacy, Jinan University, Guangzhou 510632, China

<sup>2</sup> School of Pharmaceutical Sciences, Sun Yat-sen University, Guangzhou 510006, China

<sup>3</sup> The Fourth Affiliated Hospital of Guangzhou Medical University, Guangzhou 511300, China

\* Correspondence: huangzhengw@jnu.edu.cn (Z. Huang), quanguilan@jnu.edu.cn (G. Quan)

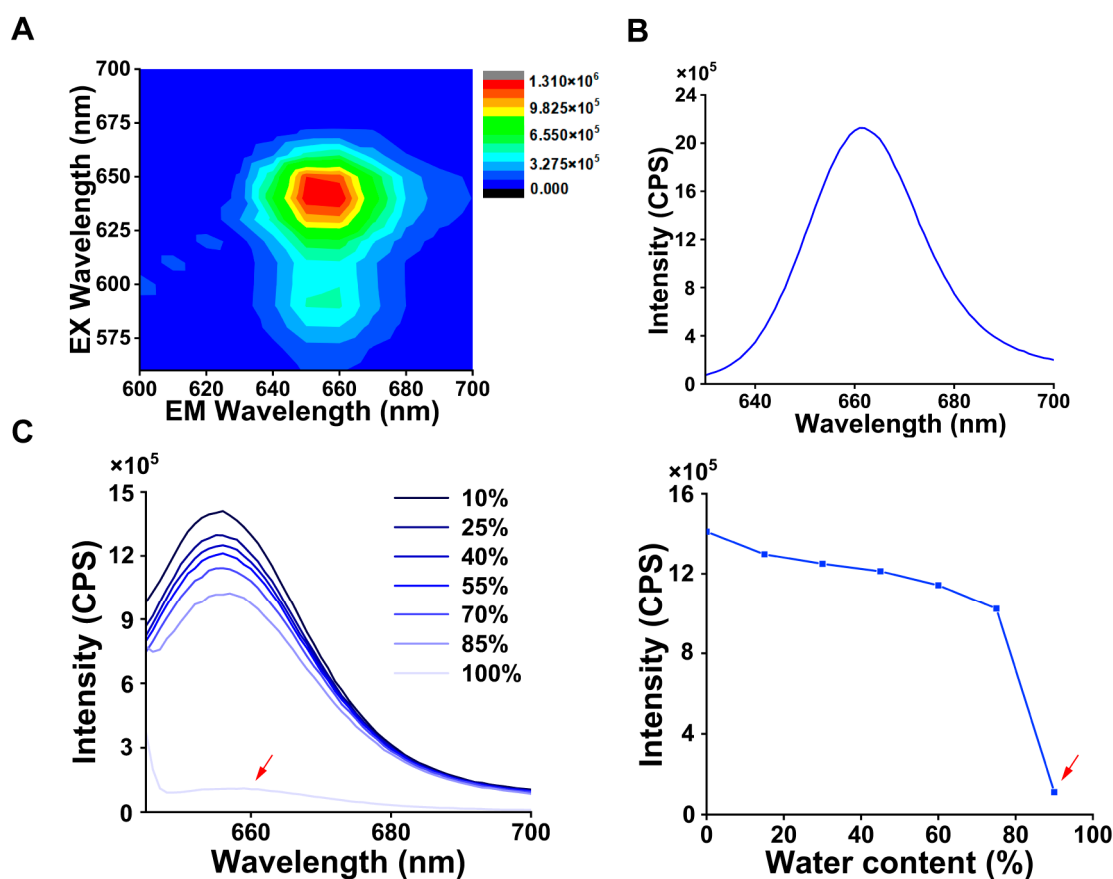

**Figure S1.** (A) Fluorescence emission contour map of P4 probes. (B) Fluorescence emission spectrum of P4 probes. (C) Fluorescence emission spectra (left) and peak intensity transition (right) of P4 probes in water-acetonitrile co-solvent with 10–100% (v/v) water content.

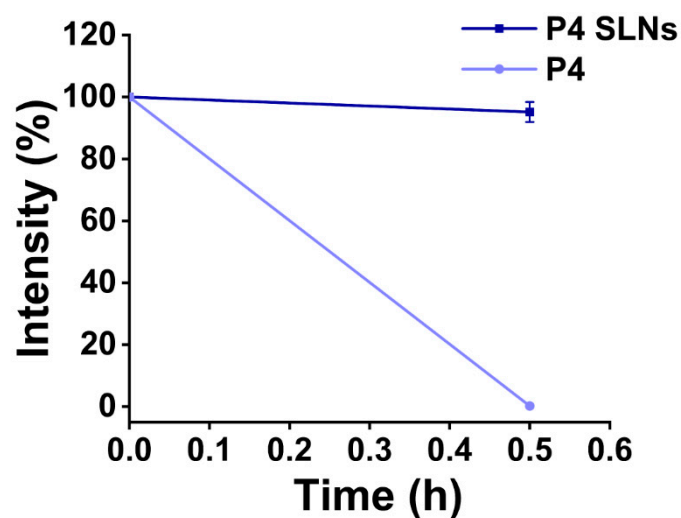

**Figure S2.** Fluorescence intensity of P4 and P4 SLNs incubated with phosphate-buffered saline solution for 0.5 h, respectively ( $n = 3$ ). Data are expressed as mean  $\pm$  SD.

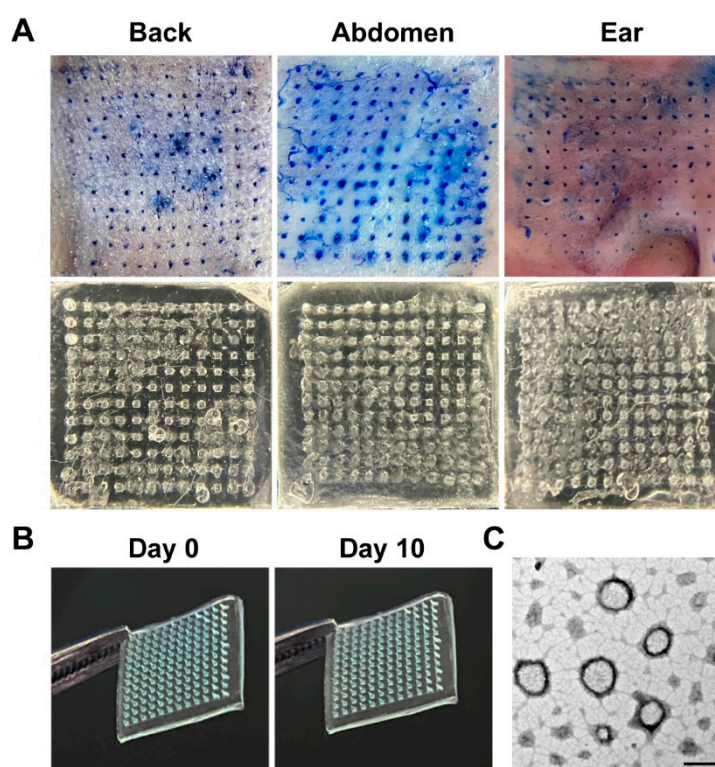

**Figure S3.** (A) The photographs of the skin by trypan blue staining (up) and the base of DMNs (down) after inserting with P4 SLNs@DMNs. (B) The appearance of P4 SLNs@DMNs before and after 10 days. (C) TEM image of dissolved P4 SLNs from P4 SLNs@DMNs (scale bar: 200 nm).

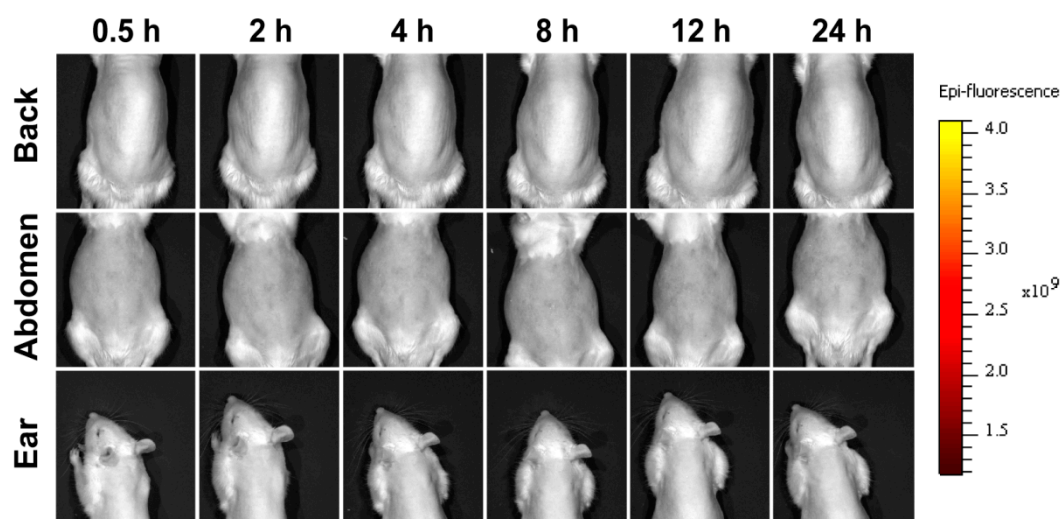

**Figure S4.** *In vivo* live imaging. Representative live images of rats without any treatment.

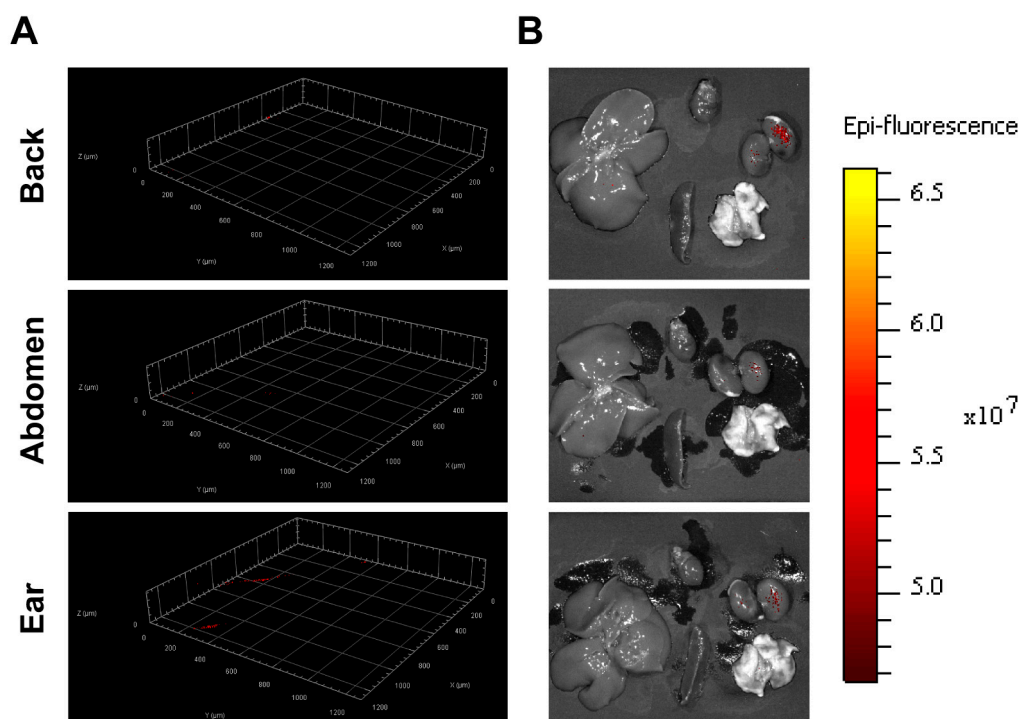

**Figure S5.** *Ex vivo* imaging. (A) Representative CLSM 3D reconstruction images of the skin of back, abdomen, and ear without any treatment at 4 h. (B) Representative fluorescent images of major organs without any treatment at 4 h.
